# Supplementary material for: Identification of novel drug targets for the risk and prognosis of COVID-19
Source: PubMed Central journal article supplement — Ann Transl Med. 2022 Jun;10(11):624. doi: 10.21037/atm-21-6612 (PMC9263786; doi:10.21037/atm-21-6612), 2022-06
Supplement: atm-10-11-624-supplementary.pdf [file atm-10-11-624-supplementary.pdf]

**Table S1** Demographic characteristics of included Proteome GWASs used in the present MR analysis

| GWAS           | Sample size      | Number of proteins                         | Measurement methods                                        |
|----------------|------------------|--------------------------------------------|------------------------------------------------------------|
| YFS/FINRISK    | 8,293 Caucasians | 41 cytokines                               | Bead-based immunoassays                                    |
| IMPROVE        | 3,394 Caucasians | 83 cardiovascular disease-related proteins | Modified antibodies conjugated to oligonucleotides         |
| KORA F4/QMDiab | 1,000 Caucasians | 1,124 proteins                             | Slow off-rate modified aptamers (SOMAmers)                 |
| INTERVAL       | 3,301 Caucasians | 2,994 proteins                             | SOMAmers                                                   |
| FHS            | 6,861 Caucasians | 71 cardiovascular disease-related proteins | Modified enzyme-linked immunosorbent assay sandwich method |
| AGES           | 5,457 Caucasians | 4,137 proteins                             | SOMAmers                                                   |

**Table S2** Demographic characteristics of included COVID-19 GWAS used in the present MR analysis (round 3)

| GWAS           | Sample information                                                                                        |
|----------------|-----------------------------------------------------------------------------------------------------------|
| Susceptibility |                                                                                                           |
| C1             | COVID (N=3,523) vs. lab/self-reported negative (N=36,634)                                                 |
| C2             | COVID (N=6,696) vs. population (N=1,073,072)                                                              |
| D1             | Predicted COVID from self-reported symptoms (N=1,865) vs. predicted or self-reported non-COVID (N=29,174) |
| Severity       |                                                                                                           |
| A2             | Very severe respiratory confirmed COVID (N=536) vs. population (N=329,391)                                |
| B1             | Hospitalized COVID (N=928) vs. not hospitalized COVID (N=2,028)                                           |
| B2             | Hospitalized COVID (N=3,199) vs. population (N=897,488)                                                   |

**Table S3** Genetic correlation between proteome and COVID-19 susceptibility and severity

| Outcome                                                              | Biomarker                                                        | Method                                | N SNPs     | OR    | LCI   | UCI   | P value  |          |
|----------------------------------------------------------------------|------------------------------------------------------------------|---------------------------------------|------------|-------|-------|-------|----------|----------|
| Susceptibility (C2)                                                  | Tissue factor                                                    | Wald ratio                            | 1          | 0.667 | 0.484 | 0.850 | 1.47E-05 |          |
|                                                                      | A disintegrin and metalloproteinase with thrombospondin motifs 6 | Wald ratio                            | 1          | 0.957 | 0.914 | 1.001 | 0.049    |          |
|                                                                      | Agouti-signaling protein                                         | Wald ratio                            | 1          | 1.070 | 1.017 | 1.123 | 0.012    |          |
|                                                                      | alpha-Fetoprotein                                                | Wald ratio                            | 1          | 0.797 | 0.642 | 0.952 | 0.004    |          |
|                                                                      | Alpha-synuclein                                                  | Wald ratio                            | 1          | 0.795 | 0.628 | 0.963 | 0.007    |          |
|                                                                      | Binatriuretic peptides                                           | Wald ratio                            | 1          | 0.775 | 0.62  | 0.931 | 0.001    |          |
|                                                                      | Cartilage acidic protein 1                                       | Wald ratio                            | 1          | 1.085 | 1.004 | 1.167 | 0.048    |          |
|                                                                      | Cathepsin H                                                      | Wald ratio                            | 1          | 1.043 | 1.008 | 1.078 | 0.02     |          |
|                                                                      | C-C motif chemokine 25                                           | Wald ratio                            | 1          | 1.242 | 1.087 | 1.396 | 0.006    |          |
|                                                                      | CD166 antigen                                                    | Wald ratio                            | 1          | 0.851 | 0.718 | 0.983 | 0.017    |          |
|                                                                      | Complement C1q subcomponent subunit C                            | Wald ratio                            | 1          | 0.837 | 0.693 | 0.980 | 0.015    |          |
|                                                                      | Complement factor H-related protein 1                            | Wald ratio                            | 1          | 1.039 | 1.01  | 1.068 | 0.011    |          |
|                                                                      | CXADR-like membrane protein                                      | Wald ratio                            | 1          | 1.165 | 1.041 | 1.288 | 0.015    |          |
|                                                                      | Enoyl-CoA delta isomerase 2                                      | Wald ratio                            | 1          | 1.300 | 1.091 | 1.509 | 0.014    |          |
|                                                                      | Fibroblast growth factor 19                                      | Wald ratio                            | 1          | 1.251 | 1.111 | 1.39  | 0.002    |          |
|                                                                      | Galectin-4                                                       | Wald ratio                            | 1          | 0.861 | 0.712 | 1.009 | 0.048    |          |
|                                                                      | Golgi membrane protein 1                                         | Wald ratio                            | 1          | 1.161 | 1.068 | 1.254 | 0.002    |          |
|                                                                      | Granulins                                                        | IVW                                   | 6          | 0.942 | 0.884 | 0.999 | 0.041    |          |
|                                                                      | Inter-alpha-trypsin inhibitor heavy chain H1                     | IVW                                   | 2          | 0.934 | 0.868 | 1.000 | 0.042    |          |
|                                                                      | Inter-alpha-trypsin inhibitor heavy chain H5                     | IVW                                   | 2          | 0.855 | 0.708 | 1.002 | 0.037    |          |
|                                                                      | Interleukin-27                                                   | IVW                                   | 2          | 1.028 | 1.002 | 1.053 | 0.034    |          |
|                                                                      | Interleukin-27 subunit alpha                                     | IVW                                   | 2          | 1.056 | 1.004 | 1.108 | 0.041    |          |
|                                                                      | Interleukin-7                                                    | Wald ratio                            | 1          | 0.859 | 0.728 | 0.989 | 0.022    |          |
|                                                                      | Kunitz-type protease inhibitor 1                                 | Wald ratio                            | 1          | 0.906 | 0.829 | 0.984 | 0.013    |          |
|                                                                      | LanC like 1                                                      | Wald ratio                            | 1          | 0.705 | 0.409 | 1.001 | 0.021    |          |
|                                                                      | Low affinity immunoglobulin gamma Fc region receptor III-B       | Wald ratio                            | 1          | 0.919 | 0.853 | 0.985 | 0.012    |          |
|                                                                      | Mitochondrial ubiquitin ligase activator of NFKB 1               | Wald ratio                            | 1          | 1.165 | 1.066 | 1.264 | 0.003    |          |
|                                                                      | Multiple inositol polyphosphate phosphatase 1                    | Wald ratio                            | 1          | 1.212 | 1.064 | 1.360 | 0.011    |          |
|                                                                      | NAD(P)H dehydrogenase [quinone] 1                                | Wald ratio                            | 1          | 0.873 | 0.760 | 0.986 | 0.019    |          |
|                                                                      | NAD-dependent protein deacetylase sirtuin-2                      | IVW                                   | 3          | 0.936 | 0.878 | 0.993 | 0.023    |          |
|                                                                      | Neurexin-3-beta                                                  | Wald ratio                            | 1          | 1.168 | 1.028 | 1.308 | 0.030    |          |
|                                                                      | N-terminal pro-BNP                                               | Wald ratio                            | 1          | 0.837 | 0.729 | 0.945 | 0.001    |          |
|                                                                      | N-terminal prohormone of brain natriuretic peptide               | IVW                                   | 2          | 0.876 | 0.747 | 1.005 | 0.045    |          |
|                                                                      | OX-2 membrane glycoprotein                                       | Wald ratio                            | 1          | 1.248 | 1.114 | 1.382 | 0.001    |          |
|                                                                      | Protein FAM163A                                                  | Wald ratio                            | 1          | 1.085 | 1.012 | 1.158 | 0.029    |          |
|                                                                      | Protein FAM3D                                                    | Wald ratio                            | 1          | 1.082 | 1.033 | 1.131 | 0.002    |          |
|                                                                      | Rho GTPase-activating protein 1                                  | Wald ratio                            | 1          | 1.277 | 1.087 | 1.466 | 0.011    |          |
|                                                                      | Semaphorin-3G                                                    | Wald ratio                            | 1          | 0.809 | 0.682 | 0.937 | 0.001    |          |
|                                                                      | Xaa-Pro aminopeptidase 2                                         | Wald ratio                            | 1          | 1.264 | 1.082 | 1.446 | 0.012    |          |
|                                                                      | Severity (B2)                                                    | C-C motif chemokine 4                 | Wald ratio | 1     | 1.887 | 1.608 | 2.165    | 8.04E-06 |
|                                                                      |                                                                  | Tissue factor                         | Wald ratio | 1     | 0.459 | 0.132 | 0.786    | 3.01E-06 |
|                                                                      |                                                                  | 5-formyltetrahydrofolate cyclo-ligase | IVW        | 2     | 1.113 | 1.018 | 1.209    | 0.028    |
|                                                                      |                                                                  | Aspartyl/asparaginyl beta-hydroxylase | Wald ratio | 1     | 1.470 | 1.218 | 1.721    | 0.003    |
| Beta-1,4-galactosyltransferase 2                                     |                                                                  | Wald ratio                            | 1          | 1.190 | 1.040 | 1.340 | 0.023    |          |
| Beta-microseminoprotein                                              |                                                                  | Wald ratio                            | 1          | 1.096 | 1.012 | 1.179 | 0.033    |          |
| Binatriuretic peptides                                               |                                                                  | Wald ratio                            | 1          | 0.743 | 0.449 | 1.038 | 0.048    |          |
| Biotinidase                                                          |                                                                  | Wald ratio                            | 1          | 1.100 | 1.026 | 1.175 | 0.012    |          |
| Carboxypeptidase B                                                   |                                                                  | Wald ratio                            | 1          | 0.757 | 0.49  | 1.024 | 0.041    |          |
| Cathepsin H                                                          |                                                                  | Wald ratio                            | 1          | 1.063 | 1.002 | 1.123 | 0.049    |          |
| Cation-dependent mannose-6-phosphate receptor                        |                                                                  | Wald ratio                            | 1          | 1.320 | 1.075 | 1.565 | 0.026    |          |
| C-C motif chemokine 28                                               |                                                                  | IVW                                   | 2          | 1.204 | 1.030 | 1.378 | 0.037    |          |
| Chondroitin sulfate N-acetylgalactosaminyltransferase 2              |                                                                  | Wald ratio                            | 1          | 1.462 | 1.142 | 1.782 | 0.020    |          |
| Collagen alpha-1(XV) chain                                           |                                                                  | Wald ratio                            | 1          | 0.807 | 0.599 | 1.016 | 0.044    |          |
| Complement component 1 Q subcomponent-binding protein, mitochondrial |                                                                  | Wald ratio                            | 1          | 1.456 | 1.125 | 1.788 | 0.026    |          |
| CXADR-like membrane protein                                          |                                                                  | Wald ratio                            | 1          | 1.342 | 1.105 | 1.579 | 0.015    |          |
| Cytoskeleton-associated protein 2                                    |                                                                  | Wald ratio                            | 1          | 1.426 | 1.113 | 1.739 | 0.026    |          |
| Disintegrin and metalloproteinase domain-containing protein 19       |                                                                  | Wald ratio                            | 1          | 1.255 | 1.060 | 1.450 | 0.023    |          |
| Dual specificity protein phosphatase 4                               |                                                                  | Wald ratio                            | 1          | 1.405 | 1.073 | 1.736 | 0.045    |          |
| Dynactin-associated protein                                          |                                                                  | Wald ratio                            | 1          | 0.671 | 0.319 | 1.023 | 0.026    |          |
| Dynein light chain 2, cytoplasmic                                    |                                                                  | Wald ratio                            | 1          | 1.513 | 1.122 | 1.905 | 0.038    |          |
| Endothelial monocyte-activating polypeptide 2                        |                                                                  | Wald ratio                            | 1          | 0.824 | 0.634 | 1.014 | 0.046    |          |
| Ephrin type-B receptor 6                                             |                                                                  | Wald ratio                            | 1          | 1.358 | 1.094 | 1.621 | 0.023    |          |
| Ephrin-B1                                                            |                                                                  | Wald ratio                            | 1          | 1.356 | 1.087 | 1.624 | 0.026    |          |
| Fibroblast growth factor 19                                          |                                                                  | Wald ratio                            | 1          | 1.301 | 1.042 | 1.559 | 0.046    |          |
| Fibroblast growth factor 7                                           |                                                                  | Wald ratio                            | 1          | 0.616 | 0.184 | 1.048 | 0.028    |          |
| Filamin-A                                                            |                                                                  | Wald ratio                            | 1          | 0.701 | 0.388 | 1.014 | 0.026    |          |
| Golgi membrane protein 1                                             |                                                                  | Wald ratio                            | 1          | 1.191 | 1.019 | 1.364 | 0.046    |          |
| Heat shock protein beta-1                                            |                                                                  | Wald ratio                            | 1          | 1.209 | 1.042 | 1.376 | 0.026    |          |
| Heterogeneous nuclear ribonucleoproteins C1/C2                       |                                                                  | Wald ratio                            | 1          | 1.456 | 1.125 | 1.788 | 0.026    |          |
| Interleukin-10 receptor subunit beta                                 |                                                                  | Wald ratio                            | 1          | 0.512 | 0.191 | 0.832 | 4.15E-05 |          |
| Interleukin-27 subunit alpha                                         |                                                                  | IVW                                   | 2          | 1.129 | 1.032 | 1.226 | 0.014    |          |
| Interleukin-6 receptor subunit beta                                  |                                                                  | Wald ratio                            | 1          | 1.296 | 1.094 | 1.498 | 0.012    |          |
| Kallikrein-13                                                        |                                                                  | Wald ratio                            | 1          | 0.855 | 0.721 | 0.99  | 0.022    |          |
| Kallikrein-14                                                        |                                                                  | IVW                                   | 2          | 1.134 | 1.011 | 1.256 | 0.046    |          |
| Kit ligand                                                           |                                                                  | Wald ratio                            | 1          | 1.536 | 1.29  | 1.783 | 6E-04    |          |
| Leucine-rich repeats and immunoglobulin-like domains protein 3       |                                                                  | Wald ratio                            | 1          | 0.838 | 0.675 | 1.001 | 0.034    |          |
| Low affinity immunoglobulin gamma Fc region receptor III-B           |                                                                  | Wald ratio                            | 1          | 0.853 | 0.720 | 0.987 | 0.020    |          |
| Macrophage inflammatory protein-1β                                   |                                                                  | IVW                                   | 2          | 1.144 | 1.046 | 1.241 | 0.007    |          |
| Mannosyl-oligosaccharide 1,2-alpha-mannosidase IB                    |                                                                  | Wald ratio                            | 1          | 1.269 | 1.041 | 1.496 | 0.04     |          |
| Melanoma-derived growth regulatory protein                           |                                                                  | Wald ratio                            | 1          | 0.921 | 0.86  | 0.982 | 0.009    |          |
| Methyltransferase-like protein 24                                    |                                                                  | Wald ratio                            | 1          | 0.676 | 0.319 | 1.033 | 0.031    |          |
| Mitochondrial ubiquitin ligase activator of NFKB 1                   |                                                                  | Wald ratio                            | 1          | 1.314 | 1.131 | 1.497 | 0.003    |          |
| Multiple inositol polyphosphate phosphatase 1                        |                                                                  | Wald ratio                            | 1          | 1.319 | 1.054 | 1.585 | 0.041    |          |
| NAD(P)H dehydrogenase [quinone] 1                                    |                                                                  | Wald ratio                            | 1          | 0.733 | 0.499 | 0.967 | 0.009    |          |
| Neuronal growth regulator 1                                          |                                                                  | Wald ratio                            | 1          | 0.684 | 0.305 | 1.063 | 0.049    |          |
| Neurotrimin                                                          |                                                                  | Wald ratio                            | 1          | 0.829 | 0.702 | 0.955 | 0.004    |          |
| NKG2D ligand 3                                                       |                                                                  | Wald ratio                            | 1          | 1.453 | 1.130 | 1.775 | 0.023    |          |
| Non-secretory ribonuclease                                           |                                                                  | Wald ratio                            | 1          | 0.776 | 0.539 | 1.013 | 0.036    |          |
| N-terminal pro-BNP                                                   | Wald ratio                                                       | 1                                     | 0.78       | 0.586 | 0.974 | 0.012 |          |          |
| N-terminal prohormone of brain natriuretic peptide                   | IVW                                                              | 2                                     | 0.705      | 0.457 | 0.952 | 0.006 |          |          |
| Osteoclast-associated immunoglobulin-like receptor                   | Wald ratio                                                       | 1                                     | 0.511      | 0.106 | 0.916 | 0.001 |          |          |
| Out at first protein homolog                                         | Wald ratio                                                       | 1                                     | 0.861      | 0.735 | 0.987 | 0.019 |          |          |
| Peptidyl-prolyl cis-trans isomerase-like 1                           | IVW                                                              | 2                                     | 1.219      | 1.027 | 1.410 | 0.043 |          |          |
| Poly(U)-specific endoribonuclease                                    | Wald ratio                                                       | 1                                     | 0.684      | 0.375 | 0.992 | 0.016 |          |          |
| Protein disulfide-isomerase A3                                       | Wald ratio                                                       | 1                                     | 1.494      | 1.129 | 1.859 | 0.031 |          |          |
| Protein eva-1 homolog C                                              | IVW                                                              | 2                                     | 1.212      | 1.075 | 1.349 | 0.006 |          |          |
| Protein FAM3D                                                        | Wald ratio                                                       | 1                                     | 1.097      | 1.006 | 1.188 | 0.046 |          |          |
| Pyruvate kinase PKLR                                                 | Wald ratio                                                       | 1                                     | 0.701      | 0.388 | 1.014 | 0.026 |          |          |
| Ras-related protein Rab-35                                           | Wald ratio                                                       | 1                                     | 1.237      | 1.050 | 1.425 | 0.026 |          |          |
| Sarcoplasmic/endoplasmic reticulum calcium ATPase 3                  | Wald ratio                                                       | 1                                     | 0.651      | 0.405 | 0.897 | 6E-04 |          |          |
| Secreted frizzled-related protein 2                                  | Wald ratio                                                       | 1                                     | 1.400      | 1.103 | 1.696 | 0.026 |          |          |
| Semaphorin-4C                                                        | Wald ratio                                                       | 1                                     | 1.495      | 1.200 | 1.790 | 0.008 |          |          |
| Serine/threonine-protein kinase 16                                   | Wald ratio                                                       | 1                                     | 1.456      | 1.125 | 1.788 | 0.026 |          |          |
| Sialic acid-binding Ig-like lectin 14                                | IVW                                                              | 2                                     | 1.069      | 1.008 | 1.129 | 0.031 |          |          |
| Spondin-1                                                            | Wald ratio                                                       | 1                                     | 1.231      | 1.082 | 1.381 | 0.006 |          |          |
| Testican-2                                                           | Wald ratio                                                       | 1                                     | 1.314      | 1.046 | 1.582 | 0.046 |          |          |
| Testis-expressed sequence 29 protein                                 | Weighted median                                                  | 3                                     | 1.201      | 1.023 | 1.379 | 0.043 |          |          |
| Testis-expressed sequence 29 protein                                 | IVW                                                              | 3                                     | 1.196      | 1.041 | 1.350 | 0.024 |          |          |
| Trypsin-2                                                            | IVW                                                              | 2                                     | 0.848      | 0.687 | 1.010 | 0.046 |          |          |
| Tumor necrosis factor receptor superfamily member 6                  | Wald ratio                                                       | 1                                     | 1.279      | 1.124 | 1.434 | 0.002 |          |          |
| Xaa-Pro aminopeptidase 2                                             | Wald ratio                                                       | 1                                     | 1.542      | 1.21  | 1.874 | 0.011 |          |          |
| Zinc-alpha-2-glycoprotein                                            | IVW                                                              | 2                                     | 1.31       | 1.107 | 1.512 | 0.009 |          |          |

Significant results after Bonferroni correction with  $P < 1.98 \times 10^{-5}$  [ $0.05/(1,263 \times 2)$ ]. Suggestive associations ( $1.98 \times 10^{-5} < P < 0.05$ ). Susceptibility: COVID vs. population (C2); severity: hospitalized COVID vs. population (B2).
